# Supplementary material for: Dynamic changes on Wilkins Ice Shelf during the 2006–2009 retreat derived from satellite observations
Source: Copernicus journal article supplement (doi:10.5194/tc-2016-218), 2016-10-18
Supplement: Supplementary file 1 [file tc-2016-218-supplement.pdf]

*Supplement of*

**Dynamic changes on Wilkins Ice Shelf during the 2006-2009 retreat  
derived from satellite observations**

**M. Rankl et al.**

*Correspondence to:* Melanie Rankl (melanie.rankl@fau.de)

## S1 SAR Data

**Table S 1: Satellites and sensors used.**

### Intensity offset tracking

| Sensor      | Date       | Rel. orbit/strip | Frame     |
|-------------|------------|------------------|-----------|
| ALOS PALSAR | 18/09/2008 | 169              | 5680-5740 |
| ALOS PALSAR | 03/11/2008 | 169              | 5680-5740 |
| ALOS PALSAR | 22/10/2008 | 171              | 5680-5720 |
| ALOS PALSAR | 07/12/2008 | 171              | 5680-5720 |
| ALOS PALSAR | 28/09/2008 | 175              | 5680-5720 |
| ALOS PALSAR | 12/11/2008 | 175              | 5680-5720 |
| ALOS PALSAR | 15/05/2006 | 181              | 5670-5700 |
| ALOS PALSAR | 03/07/2006 | 181              | 5670-5700 |
| ALOS PALSAR | 14/06/2006 | 190              | 5650-5680 |
| ALOS PALSAR | 30/07/2006 | 190              | 5650-5680 |
| ALOS PALSAR | 09/06/2006 | 185              | 5650-5690 |
| ALOS PALSAR | 25/07/2006 | 185              | 5650-5690 |
| ALOS PALSAR | 26/06/2007 | 175              | 5670-5720 |
| ALOS PALSAR | 28/09/2007 | 167              | 5700-5730 |
| ALOS PALSAR | 11/11/2007 | 175              | 5670-5720 |
| ALOS PALSAR | 13/11/2007 | 167              | 5700-5730 |
| ALOS PALSAR | 20/10/2007 | 171              | 5680-5720 |
| ALOS PALSAR | 05/12/2007 | 171              | 5680-5720 |
| ALOS PALSAR | 21/09/2009 | 169              | 5700-5720 |
| ALOS PALSAR | 06/11/2009 | 169              | 5700-5720 |
| ALOS PALSAR | 09/09/2009 | 171              | 5690-5720 |
| ALOS PALSAR | 25/10/2009 | 171              | 5690-5720 |
| ALOS PALSAR | 01/10/2009 | 175              | 5680-5710 |
| ALOS PALSAR | 16/11/2009 | 175              | 5680-5710 |
| ALOS PALSAR | 09/10/2010 | 180              | 5650-5680 |
| ALOS PALSAR | 24/11/2010 | 180              | 5650-5680 |
| ALOS PALSAR | 09/08/2010 | 169              | 5700-5730 |
| ALOS PALSAR | 24/09/2010 | 169              | 5700-5730 |
| ALOS PALSAR | 29/09/2010 | 174              | 5670-5710 |
| ALOS PALSAR | 14/11/2010 | 174              | 5670-5710 |
| ERS-1/2 SAR | 02/03/1994 | 019              | 5728      |
| ERS-1/2 SAR | 17/03/1994 | 019              | 5728      |

**ERS-1/2 DInSAR**

| Sensor      | Date       | Rel. Orbit | Frame |
|-------------|------------|------------|-------|
| ERS-1/2 SAR | 23/10/1995 | 305        | 5715  |
| ERS-1/2 SAR | 24/10/1995 | 305        | 5715  |
| ERS-1/2 SAR | 11/03/1996 | 305        | 5715  |
| ERS-1/2 SAR | 12/03/1996 | 305        | 5715  |
| ERS-1/2 SAR | 08/03/1994 | 019        | 5715  |
| ERS-1/2 SAR | 11/03/1994 | 019        | 5715  |
| ERS-1/2 SAR | 03/03/1996 | 195        | 5085  |
| ERS-1/2 SAR | 04/03/1996 | 195        | 5085  |

S2 Intensity offset tracking

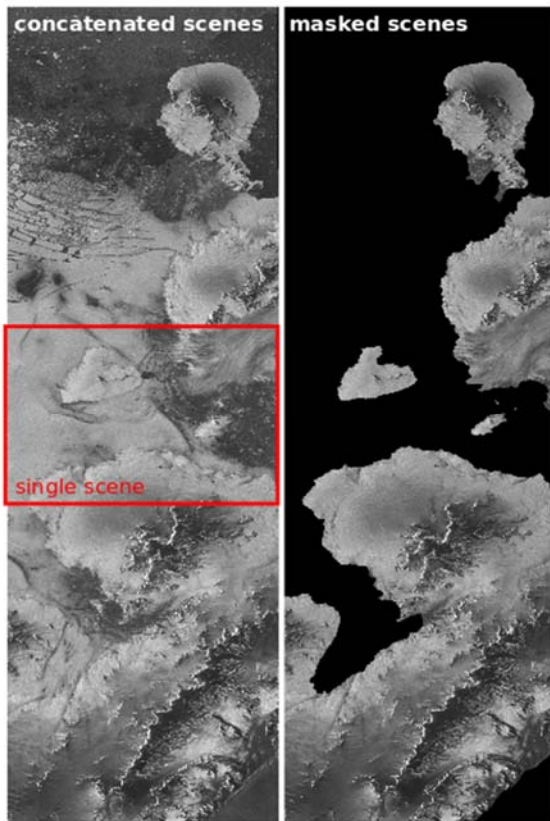

Figure S1: Example for concatenated and masked ALOS PALSAR SLC imagery.

## S2.1 Error estimation of velocity products

The estimation of errors in the derived velocity products follows the method as described in Seehaus et al. (2015). The error estimation of the derived velocity fields consists of one term  $\sigma_v^C$  which describes uncertainties in the co-registration process. The magnitude of this term was derived from the median of stable points (up to 25000 samples per image pair) over ice rises, where zero ice motion is assumed. The second term  $\sigma_v^T$  describes uncertainties involved in the intensity tracking algorithm using

$$\sigma_v^T = \frac{C\Delta x}{z\Delta t} \quad (\text{Seehaus et al., 2015})$$

Where  $C$  is the uncertainty of the tracking algorithm ( $C=0.4$ ),  $\Delta x$  the image resolution in ground range,  $z$  the oversampling factor used in the tracking process and  $\Delta t$  the time period between image acquisitions. The final error estimate  $\sigma_v$  is derived from the sum of both term  $\sigma_v^C$  and  $\sigma_v^T$ .

**Table S2: Error estimation of derived velocity fields.**

| date                   | sensor  | $\sigma_v^C$ | $\sigma_v^T$ | $\sigma_v^{\square}$ |
|------------------------|---------|--------------|--------------|----------------------|
| yyyy-mm-dd--yyyy-mm-dd |         | [m/d]        | [m/d]        | [m/d]                |
| 1994-03-02--1994-03-17 | ERS SAR | 0,0645311    | 0,2          | 0,2645311            |
| 2006-05-18--2006-07-03 | PALSAR  | 0,0707297    | 0,03         | 0,1007297            |
| 2006-06-09--2006-07-25 | PALSAR  | 0,249185     | 0,03         | 0,279185             |
| 2006-06-14--2006-07-30 | PALSAR  | 0,267962     | 0,03         | 0,297962             |
| 2007-09-26--2007-11-11 | PALSAR  | 0,25396      | 0,03         | 0,28396              |
| 2007-09-28--2007-11-13 | PALSAR  | 0,1755955    | 0,03         | 0,2055955            |
| 2007-10-20--2007-12-05 | PALSAR  | 0,0428592    | 0,03         | 0,0728592            |
| 2008-09-18--2008-11-03 | PALSAR  | 0,186815     | 0,03         | 0,216815             |
| 2008-09-28--2008-11-13 | PALSAR  | 0,113365     | 0,03         | 0,143365             |
| 2008-10-22--2008-12-07 | PALSAR  | 0,037087     | 0,03         | 0,067087             |
| 2009-09-09--2009-10-25 | PALSAR  | 0,06461115   | 0,03         | 0,09461115           |
| 2009-09-21--2009-11-06 | PALSAR  | 0,0428839    | 0,03         | 0,0728839            |
| 2009-10-01--2009-11-16 | PALSAR  | 0,1476365    | 0,03         | 0,1776365            |
| 2010-08-09--2010-09-24 | PALSAR  | 0,04809755   | 0,03         | 0,07809755           |
| 2010-09-29--2010-11-14 | PALSAR  | 0,0657041    | 0,03         | 0,0957041            |
| 2010-10-09--2010-11-24 | PALSAR  | 0,08         | 0,03         | 0,11                 |

### S3 ERS-1/-2 Differential Interferometry

The location of the grounding zone was determined by using double differential SAR Interferometry (DInSAR) applied on ERS-1/-2 scenes (Fricker et al., 2009; Rignot, 1996; Rignot et al., 2011). During the ERS tandem phase (May 1995 to June 1996), both ERS satellites follow the same relative orbit with ERS-2 24 hours behind ERS-1 (Moore et al., 1999). This configuration allows for precise deformation measurements due to low spatial and temporal decorrelation of the signal. In order to extract the topographic phase information, we used 4-pass differential SAR interferometry (Rignot et al., 2011). The phase information of both interferograms contains vertical and horizontal displacements in range direction based on surface topography, ice flow, tidal motion, imaging geometry and noise (Rignot et al., 2011). By differencing the interferograms, the influence of the horizontal ice motion is removed, which is assumed to be constant between the image acquisitions. The vertical tidal signal, which is not constant over time, remains in the differential interferogram and allows to identify the grounding zone between grounded and floating ice of an ice shelf. The resulting differential interferogram contains an area of narrow fringes, which marks the flexure of the ice shelf plate and hence the dimension of the grounding zone (Figure S2). The differential interferogram was geocoded afterwards and the grounding line digitized based on the location of point G.

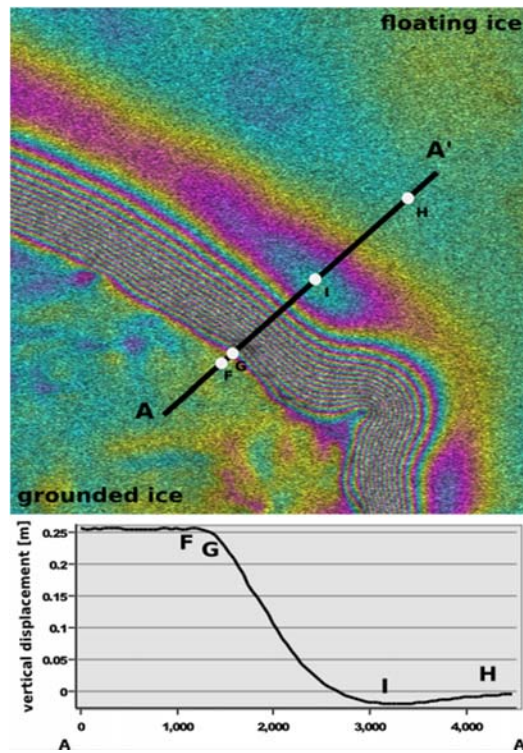

Figure S2: Grounding zone at Wilkins Ice Shelf: F: limit of tidal flexing, G: grounding line, I: local elevation minimum, H: maximum extent of flexure.

## References

- Fricker, H. A., Coleman, R., Padman, L., Scambos, T. A., Bohlander, J. and Brunt, K. M.: Mapping the grounding zone of the Amery Ice Shelf, East Antarctica using InSAR, MODIS and ICESat, *Antarct. Sci.*, 21(5), 515–532, 2009.
- Moore, P., Carnochan, S. and Walmsley, R. J.: Stability of ERS altimetry during the Tandem Mission, *Geophys. Res. Lett.*, 26(3), 373–376, doi:10.1029/1998GL900313, 1999.
- Rignot, E.: Tidal motion, ice velocity and melt rate of Petermann Gletscher, Greenland, measured from radar interferometry, *J. Glaciol.*, 42(142), 1996.
- Rignot, E., Mouginot, J. and Scheuchl, B.: Antarctic grounding line mapping from differential satellite radar interferometry, *Geophys. Res. Lett.*, 38(10), 2011.
- Seehaus, T., Marinsek, S., Helm, V., Skvarca, P. and Braun, M.: Changes in ice dynamics, elevation and mass discharge of Dinsmoor–Bombardier–Edgeworth glacier system, Antarctic Peninsula, *Earth Planet. Sci. Lett.*, 427, 125–135, 2015.
